# Supplementary material for: Identification of Saccharomyces cerevisiae Spindle Pole Body Remodeling Factors
Source: PLoS One. 2010 Nov 12;5(11):e15426. doi: 10.1371/journal.pone.0015426 (PMC2980476; doi:10.1371/journal.pone.0015426)
Supplement: Table S3 — Yeast strains used in this study. (DOC) [file pone.0015426.s003.doc]

**Table S3. Yeast strains used in this studya.**

| **Strain** | **Genotype** | **Source** |
| --- | --- | --- |
| BSY9 | *MAT****a****/MAT ADE3/ade3 CYH2s/cyh2r* | [1] |
| CRY1 | *MAT****a*** | Robert Fuller |
| GZY7-5B | *MAT****a*** *ade3-100 cyh2r lys2::HIS3* | Gefeng Zhu |
| HSY2-12C | *MAT****a*** *ade3 lys2::HIS3 spc110::TRP1 pHS26* | [2] |
| HSY11-3B | *MAT spc110-220* | [3] |
| HSY11-4D | *MAT****a*** *ade3 HIS3 spc110-220* | [3] |
| HSY18-18A | *MAT spc110-221* | [4] |
| HSY18-27A | *MAT****a*** *ade3 spc110-221* | [4] |
| KGY39 | *MAT can1::STE2pr-HIS3 lyp1 his31 leu20 ura30 met150 LYS2 GAL2::LEU2 (S288C background)* | This Study |
| KGY53 | *MAT can1::STE2pr-HIS3 lyp1 his31 leu20 ura30 met150 LYS2 GAL2::LEU2 SPC110-3xTEV696-HA::natMX4 (S288C background)* | This Study |
| KGY54 | *MAT****a*** *ade3-100 cyh2r lys2::HIS3 SPC110-3xTEV696-HA::natMX4* | This Study |
| KGY57 | *MAT****a*** *ade3-100 cyh2r lys2::HIS3 SPC110-3XTEV696-HA::natMX4 GAL-NLS-myc9-TEVprotease-NLS2::URA3* | This Study |
| KGY61 | *MAT can1::STE2pr-HIS3 lyp1 his31 leu20 ura30 met150 LYS2 GAL2::LEU2 SPC110-3XTEV696-HA::natMX4 GAL-NLS-myc9-TEVprotease-NLS2::URA3 (S288C background)* | This Study |
| KGY133-2C | *MAT****a*** *ade3 SPC110-3XTEV696-HA::natMX4 GAL-NLS-myc9-TEVprotease-NLS2::URA3 mad1::URA3* | This Study |
| KGY139-1D | *MAT**ade3-100 cyh2r lys2::HIS3 SPC110-3XTEV696-HA::natMX4 GAL-NLS-myc9-TEVprotease-NLS2::URA3 mad2::kanMX6* | This Study |
| KGY170-2A | *MAT****a*** *sac3::hphMX4* | This Study |
| KGY171-2D | *MAT nup60::hphMX4* | This Study |
| KGY172-1D | *MAT ade3 dyn3::hphMX4* | This Study |
| KGY173-1A | *MAT****a*** *ade3 kar3::hphMX4* | This Study |
| KGY174-13B | *MAT ade3 hcm1::hphMX4* | This Study |
| KGY175-8B | *MAT****a*** *ade3 rts1::hphMX4* | This Study |
| KGY177-9C | *MAT****a*** *ade3 jnm1::hphMX4* | This Study |
| KGY178-2C | *MAT****a*** *ade3 dot1::hphMX4* | This Study |
| KGY179-3B | *MAT****a*** *ade3 pom152::hphMX4* | This Study |
| KGY182 | *MAT****a****/MAT SAC3/sac3::hphMX4 SPC110/spc110-220* | This Study |
| KGY183 | *MAT****a****/MAT ADE3/ade3 HIS3/his3-11,15 NUP60/nup60::hphMX4 SPC110/spc110-220* | This Study |
| KGY184 | *MAT****a****/MAT ade3/ade3 HIS3/his3-11,15 DYN3/dyn3::hphMX4 SPC110/spc110-220* | This Study |
| KGY185 | *MAT****a****/MAT ADE3/ade3 KAR3/kar3::hphMX4 SPC110/spc110-220* | This Study |
| KGY186 | *MAT****a****/MAT ade3/ade3 HIS3/his3-11,15 HCM1/hcm1::hphMX4 SPC110/spc110-220* | This Study |
| KGY187 | *MAT****a****/MAT ADE3/ade3 RTS1/rts1::hphMX4 SPC110/spc110-220* | This Study |
| KGY189 | *MAT****a****/MAT ADE3/ade3 JNM1/jnm1::hphMX4 SPC110/spc110-220* | This Study |
| KGY190 | *MAT****a****/MAT ADE3/ade3 DOT1/dot1::hphMX4 SPC110/spc110-220* | This Study |
| KGY191 | *MAT****a****/MAT ADE3/ade3 POM152/pom152::hphMX4 SPC110/spc110-220* | This Study |
| KGY192 | *MAT****a****/MAT ADE3/ade3 HIS3/his3-11,15 UBC4/ubc4::hphMX4 SPC110/spc110-220* | This Study |
| KGY195 | *MAT****a****/MAT SAC3/sac3::hphMX4 SPC110/spc110-221* | This Study |
| KGY196 | *MAT****a****/MAT ADE3/ade3 NUP60/nup60::hphMX4 SPC110/spc110-221* | This Study |
| KGY197 | *MAT****a****/MAT ade3/ade3 DYN3/dyn3::hphMX4 SPC110/spc110-221* | This Study |
| KGY198 | *MAT****a****/MAT ADE3/ade3 KAR3/kar3::hphMX4 SPC110/spc110-221* | This Study |
| KGY199 | *MAT****a****/MAT ade3/ade3 HCM1/hcm1::hphMX4 SPC110/spc110-221* | This Study |
| KGY200 | *MAT****a****/MAT ADE3/ade3 RTS1/rts1::hphMX4 SPC110/spc110-221* | This Study |
| KGY202 | *MAT****a****/MAT ADE3/ade3 JNM1/jnm1::hphMX4 SPC110/spc110-221* | This Study |
| KGY203 | *MAT****a****/MAT ADE3/ade3 DOT1/dot1::hphMX4 SPC110/spc110-221* | This Study |
| KGY204 | *MAT****a****/MAT ADE3/ade3 POM152/pom152::hphMX4 SPC110/spc110-221* | This Study |
| KGY205 | *MAT****a****/MAT ADE3/ade3 UBC4/ubc4::hphMX4 SPC110/spc110-221* | This Study |
| KGY208 | *MAT****a****/MAT ADE3/ade3 LYS2/lys2::HIS3 SAC3/sac3::hphMX4 SPC110/spc110-226* | This Study |
| KGY209 | *MAT****a****/MAT ADE3/ade3 LYS2/lys2::HIS3 NUP60/nup60::hphMX4 SPC110/spc110-226* | This Study |
| KGY210 | *MAT****a****/MAT ade3/ade3 LYS2/lys2::HIS3 DYN3/dyn3::hphMX4 SPC110/spc110-226* | This Study |
| KGY211 | *MAT****a****/MAT ade3/ade3 LYS2/lys2::HIS3 KAR3/kar3::hphMX4 SPC110/spc110-226* | This Study |
| KGY212 | *MAT****a****/MAT ade3/ade3 LYS2/lys2::HIS3 HCM1/hcm1::hphMX4 SPC110/spc110-226* | This Study |
| KGY213 | *MAT****a****/MAT ade3/ade3 LYS2/lys2::HIS3 RTS1/rts1::hphMX4 SPC110/spc110-226* | This Study |
| KGY215 | *MAT****a****/MAT ade3/ade3 LYS2/lys2::HIS3 JNM1/jnm1::hphMX4 SPC110/spc110-226* | This Study |
| KGY216 | *MAT****a****/MAT ade3/ade3 LYS2/lys2::HIS3 DOT1/dot1::hphMX4 SPC110/spc110-226* | This Study |
| KGY217 | *MAT****a****/MAT ade3/ade3 LYS2/lys2::HIS3 POM152/pom152::hphMX4 SPC110/spc110-226* | This Study |
| KGY218 | *MAT****a****/MAT ADE3/ade3 LYS2/lys2::HIS3 UBC4/ubc4::hphMX4 SPC110/spc110-226* | This Study |
| KGY245 | *MAT****a****/MAT ade3/ade3-100 LYS2/lys2::HIS3 SAC3/sac3::hphMX4 SPC110/SPC110-3XTEV696-HA::natMX4 ura3-1/GAL-NLS-myc9-TEVprotease-NLS2::URA3* | This Study |
| KGY246 | *MAT****a****/MAT ade3/ade3-100 CYH2s/cyh2r LYS2/lys2::HIS3 NUP60/nup60::hphMX4 SPC110/SPC110-3XTEV696-HA::natMX4 ura3-1/GAL-NLS-myc9-TEVprotease-NLS2::URA3* | This Study |
| KGY247 | *MAT****a****/MAT ade3/ade3-100 CYH2s/cyh2r LYS2/lys2::HIS3 DYN3/dyn3::hphMX4 SPC110/SPC110-3XTEV696-HA::natMX4 ura3-1/GAL-NLS-myc9-TEVprotease-NLS2::URA3* | This Study |
| KGY248 | *MAT****a****/MAT ade3/ade3-100 LYS2/lys2::HIS3 KAR3/kar3::hphMX4 SPC110/SPC110-3XTEV696-HA::natMX4 ura3-1/GAL-NLS-myc9-TEVprotease-NLS2::URA3* | This Study |
| KGY249 | *MAT****a****/MAT ade3/ade3-100 CYH2s/cyh2r LYS2/lys2::HIS3 HCM1/hcm1::hphMX4 SPC110/SPC110-3XTEV696-HA::natMX4 ura3-1/GAL-NLS-myc9-TEVprotease-NLS2::URA3* | This Study |
| KGY250 | *MAT****a****/MAT ade3/ade3-100 LYS2/lys2::HIS3 RTS1/rts1::hphMX4 SPC110/SPC110-3XTEV696-HA::natMX4 ura3-1/GAL-NLS-myc9-TEVprotease-NLS2::URA3* | This Study |
| KGY252 | *MAT****a****/MAT ade3/ade3-100 LYS2/lys2::HIS3 JNM1/jnm1::hphMX4 SPC110/SPC110-3XTEV696-HA::natMX4 ura3-1/GAL-NLS-myc9-TEVprotease-NLS2::URA3* | This Study |
| KGY253 | *MAT****a****/MAT ade3/ade3-100 LYS2/lys2::HIS3 DOT1/dot1::hphMX4 SPC110/SPC110-3XTEV696-HA::natMX4 ura3-1/GAL-NLS-myc9-TEVprotease-NLS2::URA3* | This Study |
| KGY254 | *MAT****a****/MAT ade3/ade3-100 LYS2/lys2::HIS3 POM152/pom152::hphMX4 SPC110/SPC110-3XTEV696-HA::natMX4 ura3-1/GAL-NLS-myc9-TEVprotease-NLS2::URA3* | This Study |
| KGY255 | *MAT****a****/MAT ADE3/ade3-100 CYH2s/cyh2r LYS2/lys2::HIS3 UBC4/ubc4::hphMX4 SPC110/SPC110-3XTEV696-HA::natMX4 ura3-1/GAL-NLS-myc9-TEVprotease-NLS2::URA3* | This Study |
| KGY290-1D | *MAT ade3 cik1::hphMX4* | This Study |
| KGY291-1A | *MAT ade3 vik1::hphMX4* | This Study |
| KGY292-1A | *MAT ade3 mlp2::hphMX4* | This Study |
| KGY302-7B | *MAT****a*** *ade3 SPC42::GFP-kanMX6* | This Study |
| KGY307-6B | *MAT****a*** *ade3 ubc4::hphMX4 SPC42::GFP-kanMX6* | This Study |
| KGY308-1C | *MAT****a*** *cyh2r sac3::hphMX4 SPC110::GFP-kanMX6* | This Study |
| KGY309-1A | *MAT****a*** *nup60::hphMX4 SPC110::GFP-kanMX6* | This Study |
| KGY311-5A | *MAT****a*** *ade3 jnm1::hphMX4 SPC110::GFP-kanMX6* | This Study |
| KGY312-2D | *MAT****a*** *ade3 pom152::hphMX4 SPC110::GFP-kanMX6* | This Study |
| KGY313-3B | *MAT****a*** *cyh2r ubc4::hphMX4 SPC110::GFP-kanMX6* | This Study |
| KGY315 | *MAT****a****/MAT ADE3/ade3 CYH2s/cyh2r* | This Study |
| KGY321-3A | *MAT ade3-100 cyh2r lys2::HIS3 GAL-NLS-myc9-TEVprotease-NLS2::URA3* | This Study |
| KGY364-1A | *MAT ppm1::hphMX4* | This Study |
| KGY373-4D | *MAT****a*** *nup60::hphMX4 SPC110::GFP-kanMX6 GAL-myc-MPS1::URA3* | This Study |
| KGY375-7C | *MAT****a*** *jnm1::hphMX4 SPC110::GFP-kanMX6 GAL-myc-MPS1::URA3* | This Study |
| KGY376-8D | *MAT****a*** *pom152::hphMX4 SPC110::GFP-kanMX6 GAL-myc-MPS1::URA3* | This Study |
| KGY377-6D | *MAT****a*** *ubc4::hphMX4 SPC110::GFP-kanMX6 GAL-myc-MPS1::URA3* | This Study |
| KGY378-1D | *MAT****a*** *SPC110::GFP-kanMX6 GAL-myc-MPS1::URA3* | This Study |
| KGY379 | *MAT****a****/MAT ade3/ade3 HIS3/his3-11,15 CIK1/cik1::hphMX4 SPC110/spc110-220* | This Study |
| KGY380 | *MAT****a****/MAT ade3/ade3 HIS3/his3-11,15 MLP2/mlp2::hphMX4 SPC110/spc110-220* | This Study |
| KGY381 | *MAT****a****/MAT ade3/ade3 HIS3/his3-11,15 VIK1/vik1::hphMX4 SPC110/spc110-220* | This Study |
| KGY382 | *MAT****a****/MAT ADE3/ade3 HIS3/his3-11,15 PPM1/ppm1::hphMX4 SPC110/spc110-220* | This Study |
| KGY383 | *MAT****a****/MAT ade3/ade3 CIK1/cik1::hphMX4 SPC110/spc110-221* | This Study |
| KGY384 | *MAT****a****/MAT ade3/ade3 MLP2/mlp2::hphMX4 SPC110/spc110-221* | This Study |
| KGY385 | *MAT****a****/MAT ade3/ade3 VIK1/vik1::hphMX4 SPC110/spc110-221* | This Study |
| KGY386 | *MAT****a****/MAT ADE3/ade3 PPM1/ppm1::hphMX4 SPC110/spc110-221* | This Study |
| KGY387 | *MAT****a****/MAT ade3/ade3 LYS2/lys2::HIS3 CIK1/cik1::hphMX4 SPC110/spc110-226* | This Study |
| KGY388 | *MAT****a****/MAT ade3/ade3 LYS2/lys2::HIS3 MLP2/mlp2::hphMX4 SPC110/spc110-226* | This Study |
| KGY389 | *MAT****a****/MAT ade3/ade3 LYS2/lys2::HIS3 VIK1/vik1::hphMX4 SPC110/spc110-226* | This Study |
| KGY390 | *MAT****a****/MAT ADE3/ade3 LYS2/lys2::HIS3 PPM1/ppm1::hphMX4 SPC110/spc110-226* | This Study |
| KGY391 | *MAT****a****/MAT ade3/ade3-100 CYH2s/cyh2r LYS2/lys2::HIS3 CIK1/cik1::hphMX4 SPC110/SPC110-3XTEV696-HA::natMX4 ura3-1/GAL-NLS-myc9-TEVprotease-NLS2::URA3* | This Study |
| KGY392 | *MAT****a****/MAT ade3/ade3-100 CYH2s/cyh2r LYS2/lys2::HIS3 MLP2/mlp2::hphMX4 SPC110/SPC110-3XTEV696-HA::natMX4 ura3-1/GAL-NLS-myc9-TEVprotease-NLS2::URA3* | This Study |
| KGY393 | *MAT****a****/MAT ade3/ade3-100 CYH2s/cyh2r LYS2/lys2::HIS3 VIK1/vik1::hphMX4 SPC110/SPC110-3XTEV696-HA::natMX4 ura3-1/GAL-NLS-myc9-TEVprotease-NLS2::URA3* | This Study |
| KGY394 | *MAT****a****/MAT ADE3/ade3-100 CYH2s/cyh2r LYS2/lys2::HIS3 PPM1/ppm1::hphMX4 SPC110/SPC110-3XTEV696-HA::natMX4 ura3-1/GAL-NLS-myc9-TEVprotease-NLS2::URA3* | This Study |
| KGY399-1A | *MAT****a*** *mlp2::hphMX4 SPC110::GFP-kanMX6* | This Study |
| KGY405-2C | *MAT ncs2::hphMX4* | This Study |
| KGY406-1B | *MAT lsm7::hphMX4* | This Study |
| KGY409 | *MAT****a****/MAT ADE3/ade3 HIS3/his3-11,15 NCS2/ncs2::hphMX4 SPC110/spc110-220* | This Study |
| KGY410 | *MAT****a****/MAT ADE3/ade3 NCS2/ncs2::hphMX4 SPC110/spc110-221* | This Study |
| KGY411 | *MAT****a****/MAT ADE3/ade3 LYS2/lys2::HIS3 NCS2/ncs2::hphMX4 SPC110/spc110-226* | This Study |
| KGY412 | *MAT****a****/MAT ADE3/ade3-100 CYH2s/cyh2r LYS2/lys2::HIS3 NCS2/ncs2::hphMX4 SPC110/SPC110-3XTEV696-HA::natMX4 ura3-1/GAL-NLS-myc9-TEVprotease-NLS2::URA3* | This Study |
| KGY414-2B | *MAT****a*** *ncs2::hphMX4 SPC110::GFP-kanMX6* | This Study |
| KGY415 | *MAT****a****/MAT ADE3/ade3 HIS3/his3-11,15 LSM7/lsm7::hphMX4 SPC110/spc110-220* | This Study |
| KGY416 | *MAT****a****/MAT ADE3/ade3 LSM7/lsm7::hphMX4 SPC110/spc110-221* | This Study |
| KGY417 | *MAT****a****/MAT ADE3/ade3 LYS2/lys2::HIS3 LSM7/lsm7::hphMX4 SPC110/spc110-226* | This Study |
| KGY418 | *MAT****a****/MAT ADE3/ade3-100 CYH2s/cyh2r LYS2/lys2::HIS3 LSM7/lsm7::hphMX4 SPC110/SPC110-3XTEV696-HA::natMX4 ura3-1/GAL-NLS-myc9-TEVprotease-NLS2::URA3* | This Study |
| KGY428-4D | *MAT****a*** *mlp2::hphMX4 SPC110::GFP-kanMX6 GAL-myc-MPS1::URA3* | This Study |
| KGY429-7C | *MAT****a*** *ppm1::hphMX4 SPC110::GFP-kanMX6 GAL-myc-MPS1::URA3* | This Study |
| KGY431-12B | *MAT****a*** *ncs2::hphMX4 SPC110::GFP-kanMX6 GAL-myc-MPS1::URA3* | This Study |
| KGY446 | *MAT****a****/MAT ADE3/ade3-100 CYH2s/cyh2r ubc5::kanMX6/UBC5 SPC110/spc110-220* | This Study |
| KGY447 | *MAT****a****/MAT ADE3/ade3-100 CYH2s/cyh2r ubc5::kanMX6/UBC5 SPC110/spc110-221* | This Study |
| KGY448 | *MAT****a****/MAT ade3/ade3 CYH2s/cyh2r LYS2/lys2::HIS3 ubc5::kanMX6/UBC5 SPC110/spc110-226* | This Study |
| KGY449-6B | *MAT****a*** *ade3-100 cyh2r ubc5::kanMX6 SPC42::GFP-kanMX6* | This Study |
| KGY450-7C | *MAT****a*** *ade3-100 ubc5::kanMX6 SPC110::GFP-kanMX6* | This Study |
| KGY454-11D | *MAT****a*** *ubc5::kanMX6 SPC110::GFP-kanMX6 GAL-myc-MPS1::URA3* | This Study |
| KGY457 | *MAT****a****/MAT ade3-100/ade3-100 CYH2s/cyh2r LYS2/lys2::HIS3 ubc5::kanMX6/UBC5 ura3-1/GAL-NLS-myc9-TEVprotease-NLS2::URA3 SPC110/SPC110-3XTEV696-HA::natMX4* | This Study |
| KSY2-2C | *MAT****a*** *ubc4::hphMX4* | Kate Stoll |
| KSY7-1C | *MAT****a*** *ade3-100 ubc5::kanMX6* | Kate Stoll |
| SFY1 | *MAT****a*** *ade3 cyh2r lys2::HIS3 spc110-226 pHS26* | [5] |
| SFY2 | *MAT ade3 lys2::HIS3 spc110-226 pHS26* | [5] |
| SFY127-1A | *MAT mad2::kanMX6* | Susan Francis |
| TDY439-1B | *MAT****a*** *mad1::URA3* | This Study |
| Y7029 | *MAT can1::STE2pr-HIS3 lyp1 his31 leu20 ura30 met150 LYS2 (S288C background)* | [6] |
| W303 | *MAT****a*** *ade2-1oc can1-100 his3-11,15 leu2-3,112 trp1-1 ura3-1* |  |
| S288C | *MAT SUC2 gal2 mal mel flo1 flo8-1 hap1* |  |

aAll strains have the same markers as W303 except as shown.

References

1. Hazbun TR, Malmstrom L, Anderson S, Graczyk BJ, Fox B, et al. (2003) Assigning function to yeast proteins by integration of technologies. Mol Cell 12: 1353-1365.

2. Geiser JR, Sundberg HA, Chang BH, Muller EG, Davis TN (1993) The essential mitotic target of calmodulin is the 110-kilodalton component of the spindle pole body in Saccharomyces cerevisiae. Mol Cell Biol 13: 7913-7924.

3. Sundberg HA, Goetsch L, Byers B, Davis TN (1996) Role of calmodulin and Spc110p interaction in the proper assembly of spindle pole body compenents. J Cell Biol 133: 111-124.

4. Sundberg HA, Davis TN (1997) A mutational analysis identifies three functional regions of the spindle pole component Spc110p in Saccharomyces cerevisiae. Mol Biol Cell 8: 2575-2590.

5. Shimogawa MM, Graczyk B, Gardner MK, Francis SE, White EA, et al. (2006) Mps1 phosphorylation of Dam1 couples kinetochores to microtubule plus ends at metaphase. Curr Biol 16: 1489-1501.

6. Tong AH, Boone C (2006) Synthetic genetic array analysis in Saccharomyces cerevisiae. Methods Mol Biol 313: 171-192.
